# Supplementary material
Source: PubMed Central journal article supplement (PMC5410109)
Supplement: jgv-96-3165-s001.pdf [file jgv-96-3165-s001.pdf]

| <b>Characteristic</b>                                  | <b>Classical scrapie</b>                                                                        | <b>Atypical scrapie</b>                                                                                                                                              |
|--------------------------------------------------------|-------------------------------------------------------------------------------------------------|----------------------------------------------------------------------------------------------------------------------------------------------------------------------|
| Age of cases                                           | usually 2-3 years                                                                               | usually older                                                                                                                                                        |
| Genetics, <i>PRNP</i> alleles                          | VLRQ, ALRQ                                                                                      | AFRQ, ALHQ, ALRR                                                                                                                                                     |
| Pathology, vacuolation and PrP <sup>D</sup> deposition | predominantly brain stem                                                                        | predominantly cerebral and cerebellar cortices                                                                                                                       |
| Western blot profiles                                  | triple banded pattern<br>~20kDa - ~30kDa, detected by many different anti-PrP antibodies eg 6H4 | some cases show multiple bands but all have variable low molecular mass (~7-12kDa) band(s) detected only with antibodies to N terminal regions of PrP molecule eg P4 |
| Protease sensitivity of PrP <sup>Sc</sup>              | Resistant to high concentrations of Proteinase K                                                | Much more sensitive to Proteinase K digestion                                                                                                                        |
| Transmission to mice                                   | Variable transmission to wild type and transgenic mice depending on isolate                     | Does not transmit to wild type mice but will transmit to transgenic mice expressing sheep <i>PRNP</i> eg tg338                                                       |

Table S1: Summary of the main differences between classical and atypical scrapie characteristics.

| Inoculum | Scrapie type                   | Mouse scores for PrPd types and vacuolation |      |      |      |      |
|----------|--------------------------------|---------------------------------------------|------|------|------|------|
|          |                                | ITCL                                        | PRTC | COAL | PLAQ | VACU |
| Scr2     | Atypical scrapie               | 0                                           | 1    | 3    | 0.5  | 3    |
| 51x45    | Atypical scrapie               | 0                                           | 1    | 3    | 0.5  | 2.5  |
| 68x81    | Classical scrapie 21kD         | 1.5                                         | 1.5  | 1    | 3    | 1.5  |
| SSBP/1   | Classical scrapie 21kD, rapid  | 1.5                                         | 1.5  | 0    | 0    | 0.5  |
| J2916    | CH1641 classical scrapie, 19kD | 2                                           | 2    | 0    | 0    | 0.5  |
| L4824    | Unusual case                   | 0                                           | 0.5  | 3    | 0.5  | 3    |
| L4823/4* | Unusual case                   | 0                                           | 1    | 1.5  | 1.5  | 3    |
| L4823/9* | Unusual case                   | 0.5                                         | 1    | 1    | 3    | 0.5  |
| H800     | Unusual case                   | 1.5                                         | 1.5  | 0    | 3    | 0.5  |
| 13X85    | Unusual case                   | 1.5                                         | 2    | 2    | 0    | 3    |

Table S2: Immunohistochemistry detected of PrPd in tg338 mice following transmission of unusual sheep scrapie cases and controls. Values are group average from 4 mice per inoculum except for inoculum L4823 where 2 single mice (L4823/4 and L4823/9) were examined. ITCL, intracellular; PRTC, fine particulate; COAL, coalescing; PLAQ, plaques; VACU, overall vacuolation score.

# Sheep sample selection process

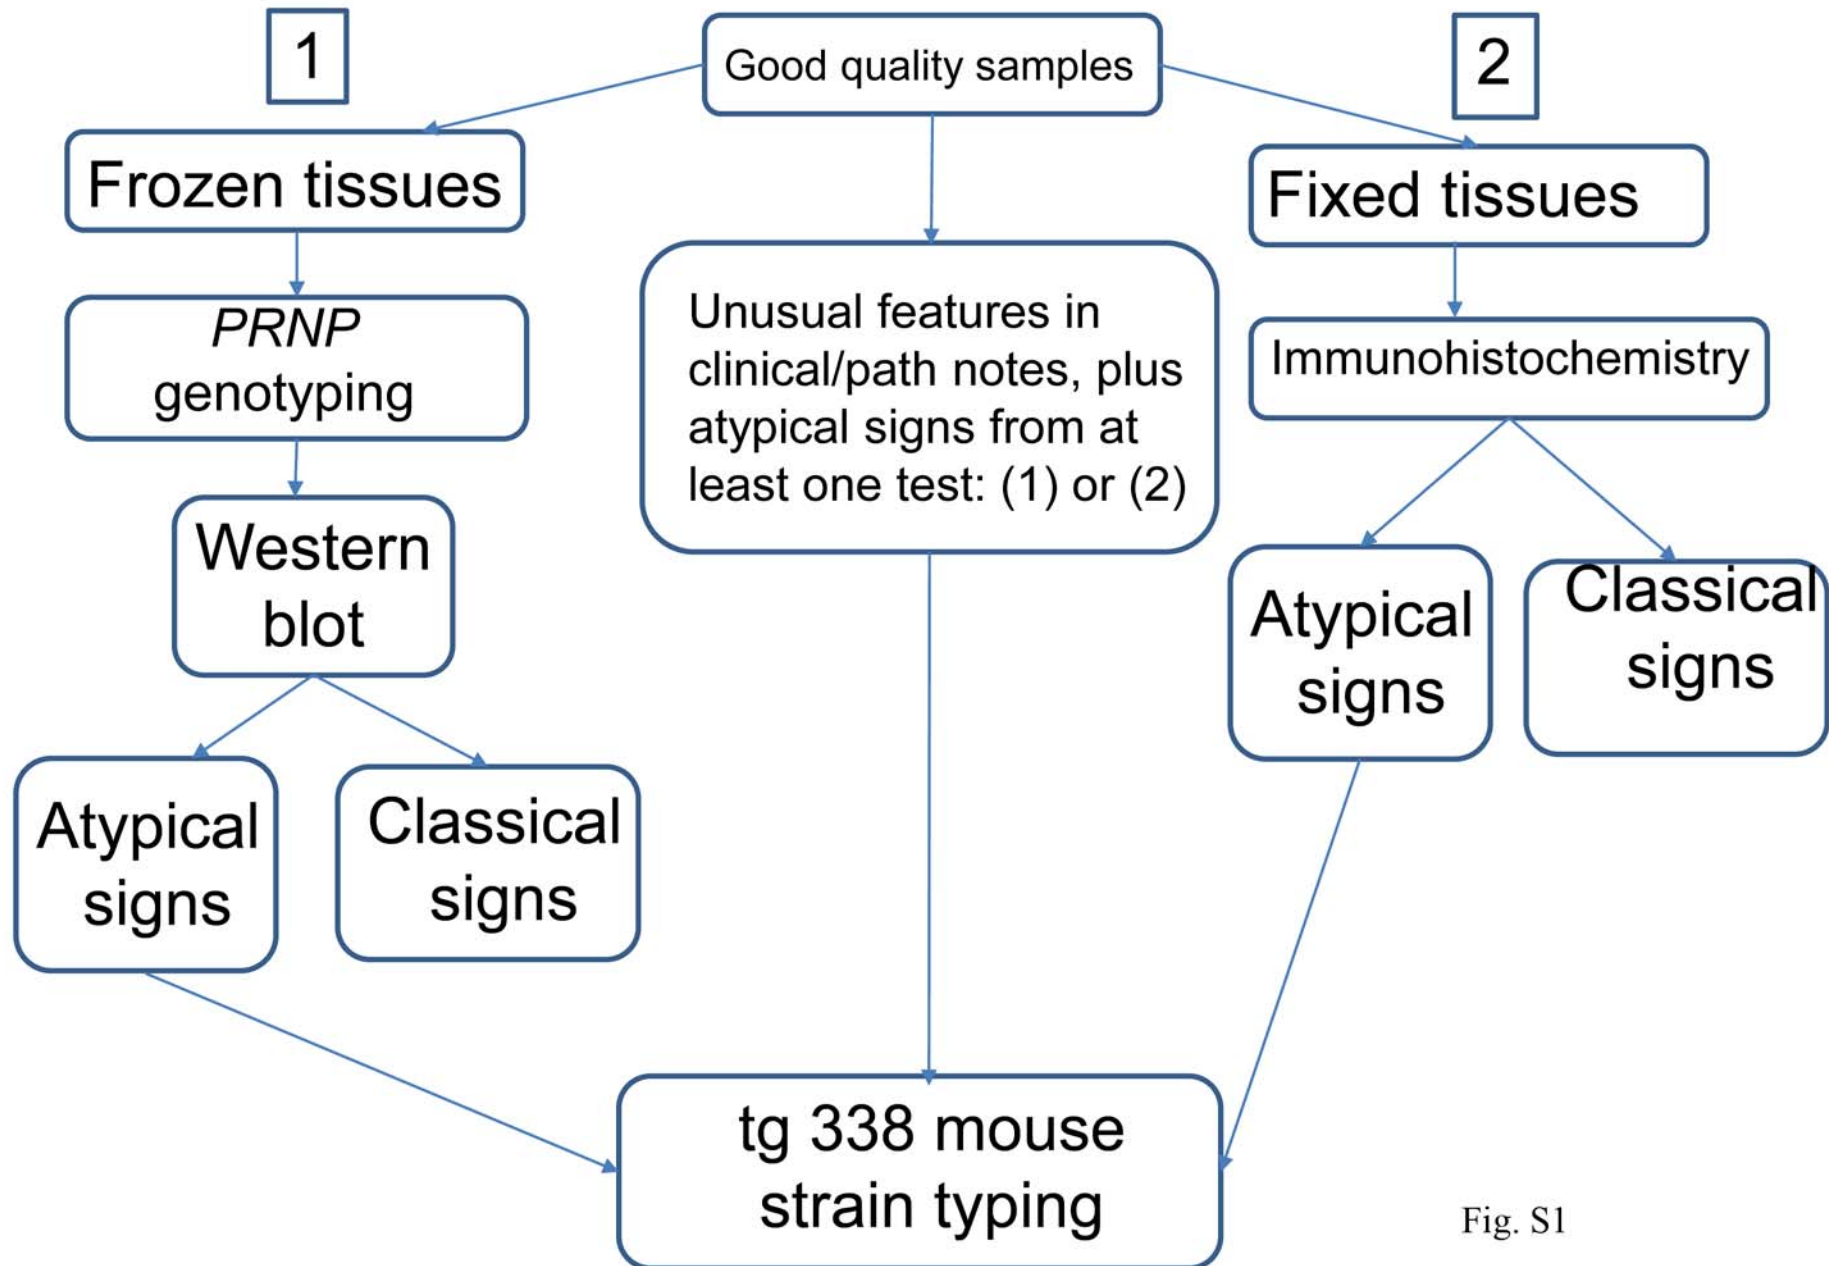

Fig. S1

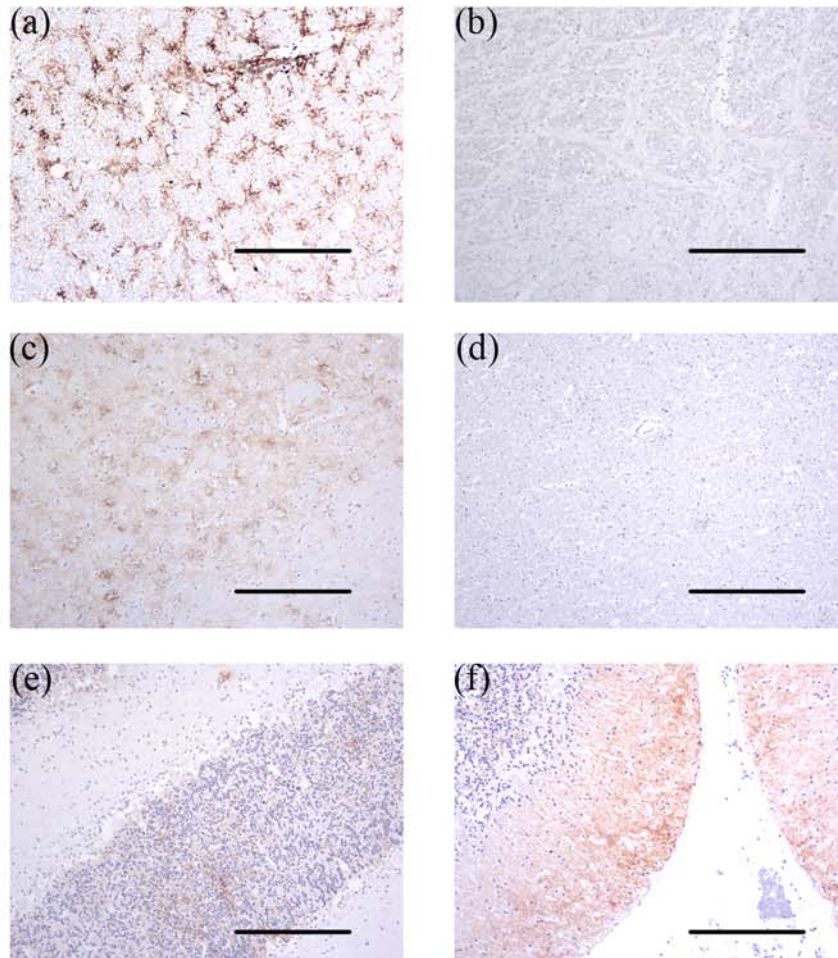

Fig. S2

**Fig S1:** Flow chart of process of selecting candidate atypical scrapie cases from archive samples dating back to 1960s.

**Fig. S2:** Immunohistochemistry using BG4 of brain sections from scrapie case L4823 (a, c, e) and its unusual scrapie case flockmate L4824 (b, d and f). Obex (a) and (b), basal ganglia (c) and (d), cerebellum (e) and (f). Size bars=500 $\mu$ m.
